# Supplementary material for: Breakdown current density in h-BN-capped quasi-1D TaSe3metallic nanowires: prospects of interconnect applications
Source: Royal Society of Chemistry journal article supplement (doi:10.1039/c6nr03469a), 2016-01-01
Supplement: c6nr03469a1.pdf [file c6nr03469a1.pdf]

## Supplemental Information

### Breakdown Current Density in BN-Capped Quasi-1D TaSe<sub>3</sub> Metallic Nanowires: Prospects of Interconnect Applications

Maxim A. Stolyarov<sup>1\*</sup>, Guanxiong Liu<sup>1\*</sup>, Matthew A. Bloodgood<sup>2</sup>, Ece Aytan<sup>1</sup>, Chenglong Jiang<sup>1</sup>, Rameez Samnakay<sup>1</sup>, Tina T. Salguero<sup>2</sup>, Denis L. Nika<sup>1,3</sup>, Sergey L. Romyantsev<sup>4</sup>, Michael S. Shur<sup>4</sup>, Krassimir N. Bozhilov<sup>5</sup> and Alexander A. Balandin<sup>1,†</sup>

<sup>1</sup>Nano-Device Laboratory (NDL) and Phonon Optimized Engineered Materials (POEM) Center, Department of Electrical and Computer Engineering, University of California – Riverside, Riverside, California 92521 USA

<sup>2</sup>Department of Chemistry, University of Georgia, Athens, Georgia 30602 USA

<sup>3</sup>E. Pokatilov Laboratory of Physics and Engineering of Nanomaterials, Department of Physics and Engineering, Moldova State University, Chisinau, MD-2009 Republic of Moldova

<sup>4</sup>Department of Electrical, Computer and Systems Engineering, Rensselaer Polytechnic Institute, Troy, NY 12180 USA

<sup>5</sup>Central Facility for Advanced Microscopy and Microanalysis, University of California – Riverside, Riverside, California 92521 USA

#### I. Materials Characterization

The samples for x-ray diffraction (XRD) were prepared by grinding TaSe<sub>3</sub> crystals in a mortar and pestle before pressing into an aluminum mount. Data were collected on a Bruker D8-Advance (Co-K $\alpha$  radiation) diffractometer from 10-80  $2\theta$  at a rate of 0.1 s per step at 40 mA,

---

\* These authors contributed equally to the project.

† Corresponding author (A.A.B.): [balandin@ece.ucr.edu](mailto:balandin@ece.ucr.edu)

40 kV. For SEM/EDS and EPMA analyses, crystals were mounted on double-sided carbon tape. SEM images were acquired with an FEI Inspect F field emission gun scanning electron microscope operated at 20 keV, with an EDAX energy dispersive spectroscopy attachment. EPMA data were collected with a JEOL JXA 8600 Superprobe instrument.

## II. Optical Microscopy

High-quality TaSe<sub>3</sub> crystals were prepared by the chemical vapor transport (CVT) method using iodine. Figure S1 is an optical microscopy image of the synthesized TaSe<sub>3</sub> crystals before chemical and mechanical exfoliation.

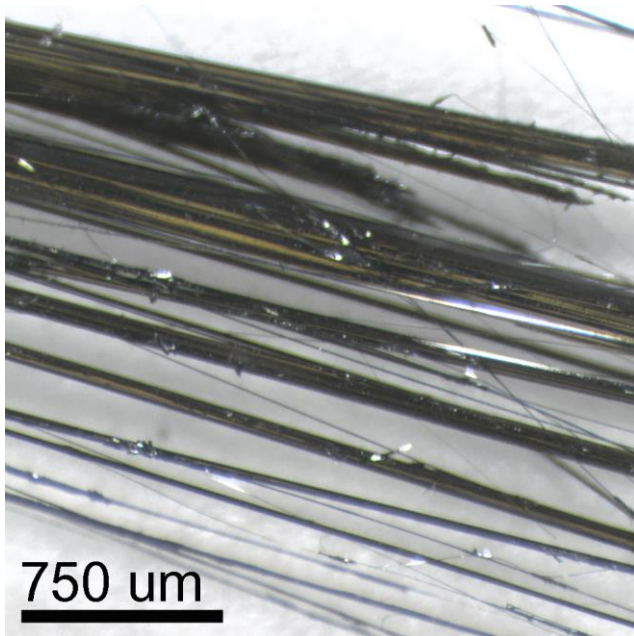

**Figure S1:** Optical microscopy image of TaSe<sub>3</sub> crystals.

## III. Transmission Electron Microscopy

Transmission electron microscopy and electron diffraction were performed on a FEI Tecnai12 TEM at the Central Facility for Advanced Microscopy and Microanalysis at UC Riverside.

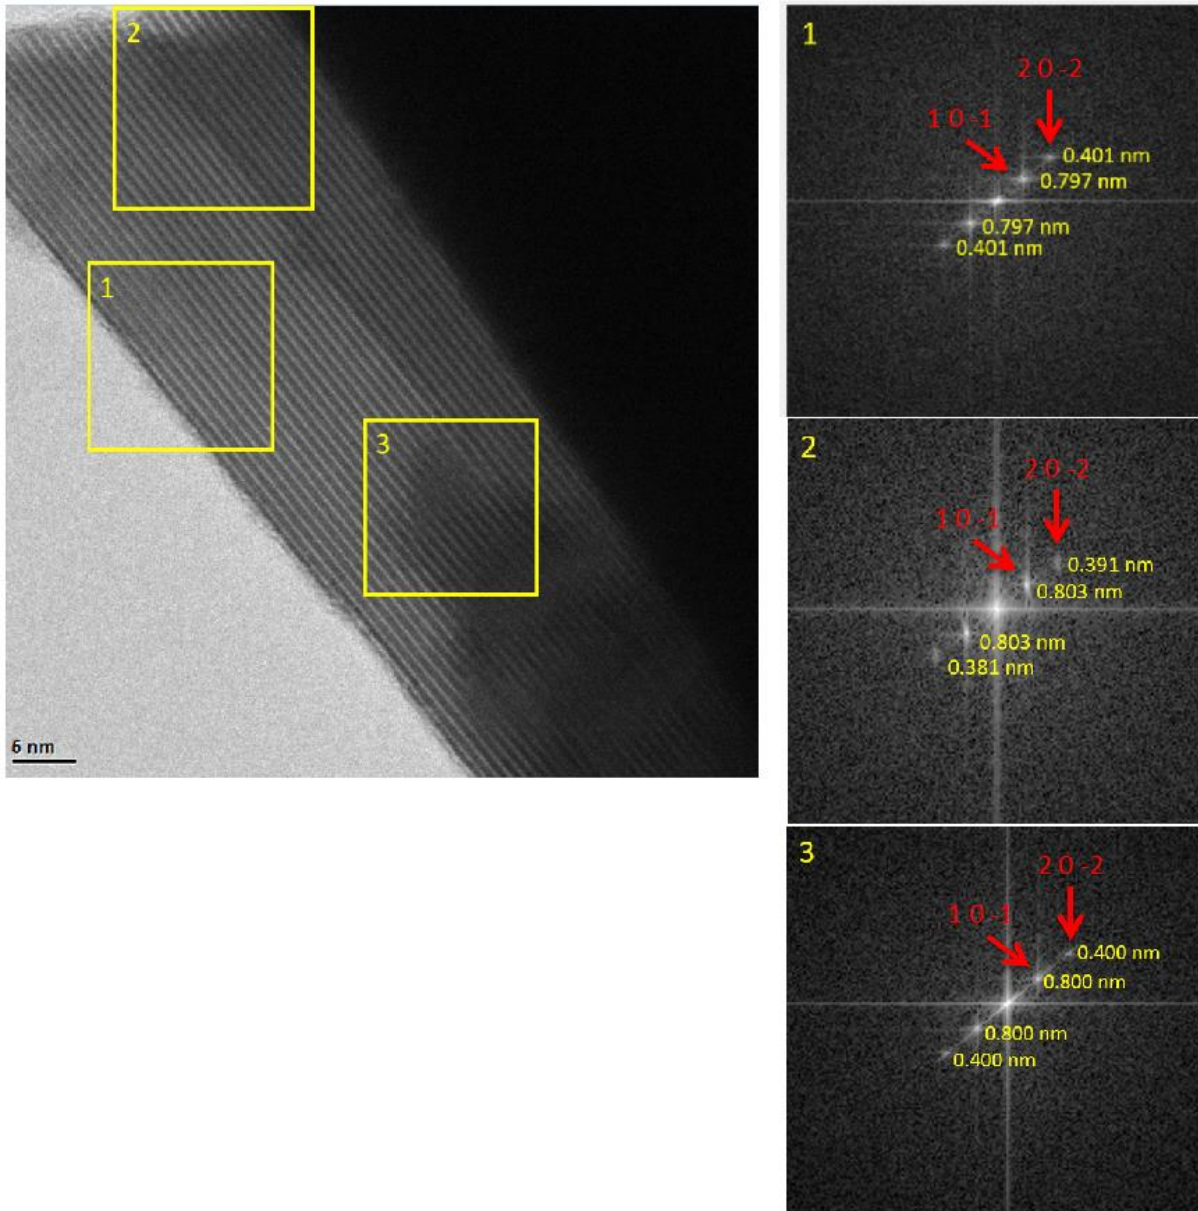

**Figure S2:** FFT analysis for the HRTEM image in Figure 1(c). Spots were matched using d-spacing values for the monoclinic TaSe<sub>3</sub> structure (below).

**Table S1:** Values for the d-spacing of the monoclinic TaSe<sub>3</sub> structure.

| monoclinic TaSe <sub>3</sub> |         |            |    |   |    |
|------------------------------|---------|------------|----|---|----|
| d-spacing[Å]                 | 2θ      | rel. I [%] | h  | k | l  |
| 9.9859                       | 8.848   | 3.15       | 1  | 0 | 0  |
| 9.4358                       | 9.365   | 8.85       | 0  | 0 | 1  |
| 8.0801                       | 10.941  | 100.00     | 1  | 0 | -1 |
| 6.0631                       | 14.598  | 1.87       | 1  | 0 | 1  |
| 5.0342                       | 17.603  | 20.60      | 2  | 0 | -1 |
| 4.9930                       | 17.750  | 32.57      | 2  | 0 | 0  |
| 4.8186                       | 18.398  | 34.57      | 1  | 0 | 2  |
| 4.71793                      | 18.7924 | 14.93      | 0  | 0 | 2  |
| 4.04007                      | 21.9818 | 2.60       | 2  | 0 | -2 |
| 3.97683                      | 22.3358 | 4.06       | 2  | 0 | 1  |
| 3.86795                      | 22.9730 | 29.93      | 1  | 0 | 2  |
| 3.45741                      | 25.7450 | 13.02      | 3  | 0 | -1 |
| 3.32864                      | 26.7591 | 0.09       | 3  | 0 | 0  |
| 3.29879                      | 27.0058 | 0.16       | 1  | 1 | 0  |
| 3.27740                      | 27.1854 | 0.96       | 0  | 1 | 1  |
| 3.27416                      | 27.2128 | 0.13       | 1  | 0 | -3 |
| 3.20778                      | 27.7871 | 4.55       | -1 | 1 | 1  |
| 3.16988                      | 28.1262 | 1.48       | 3  | 0 | -2 |
| 3.14528                      | 28.3507 | 4.40       | 0  | 0 | 3  |
| 3.07820                      | 28.9820 | 0.27       | 2  | 0 | -3 |
| 3.03154                      | 29.4380 | 1.89       | 2  | 0 | 2  |
| 3.02795                      | 29.4737 | 7.74       | 1  | 1 | 1  |
| 2.89503                      | 30.8598 | 2.40       | 3  | 0 | 1  |
| 2.87095                      | 31.1252 | 0.52       | -2 | 1 | 1  |
| 2.86324                      | 31.2112 | 5.52       | 2  | 1 | 0  |
| 2.82917                      | 31.5968 | 97.78      | -1 | 1 | 2  |
| 2.80836                      | 31.8370 | 3.79       | 0  | 1 | 2  |
| 2.78487                      | 32.1129 | 0.04       | 1  | 0 | -3 |
| 2.69338                      | 33.2348 | 0.17       | 3  | 0 | -3 |

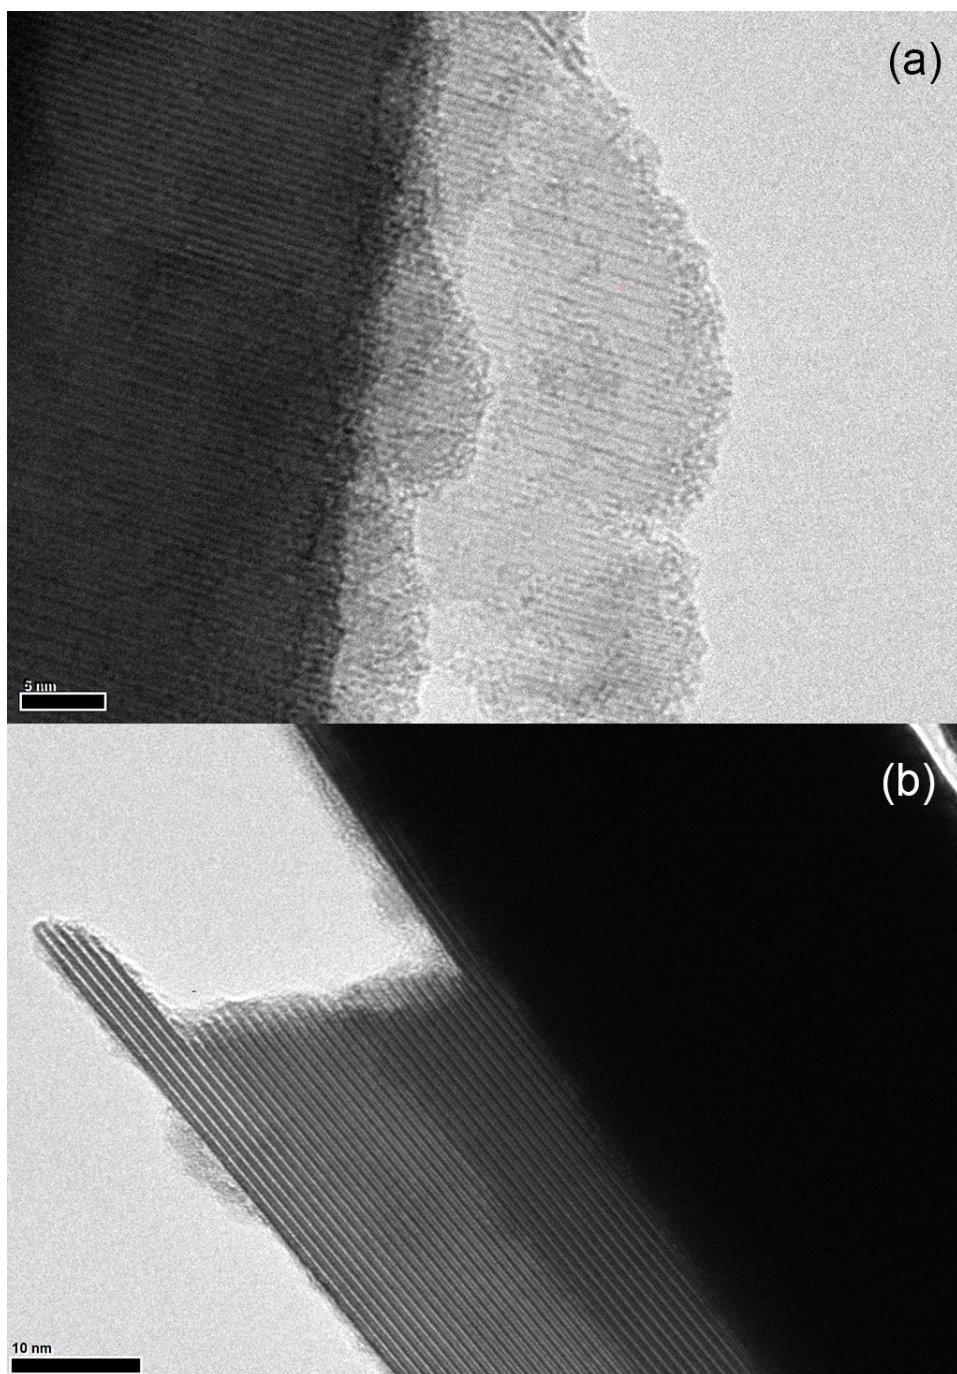

**Figure S3:** Additional TEM images of quasi-1D TaSe<sub>3</sub> nanowires after chemical exfoliation.

#### IV. Analysis of Elemental Composition

**Table S2:** Data on the elemental composition of CVT-grown TaSe<sub>3</sub> crystals are summarized below.

|          | Theoretical<br>weight % | Experimental<br>weight % |       | Theoretical<br>atomic % | Experimental<br>atomic % |       |
|----------|-------------------------|--------------------------|-------|-------------------------|--------------------------|-------|
|          |                         | EPMA                     | EDS   |                         | EPMA                     | EDS   |
| Se       | 56.70                   | 55.12                    | 54.94 | 75.00                   | 73.47                    | 74.08 |
| Ta       | 43.30                   | 43.13                    | 45.06 | 25.00                   | 26.53                    | 25.92 |
| Total    |                         |                          |       |                         |                          |       |
| weight % | 100.0                   | 98.25                    | 100.0 | -                       | -                        | -     |
| Se/Ta    | -                       | -                        | -     | 3.00                    | 2.77                     | 2.86  |

#### V. Atomic Force Microscopy

Figure S4 illustrates AFM characterization of the current breakdown point in TaSe<sub>3</sub> nanowire.

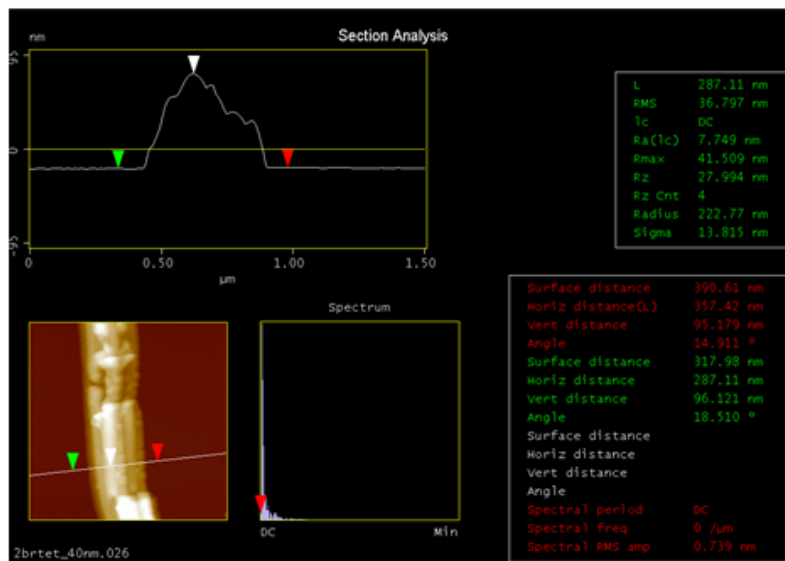

**Figure S4:** Representative AFM image of the breakdown point in TaSe<sub>3</sub> nanowire.

## VI. Device Fabrication

In order to prevent material oxidation, TaSe<sub>3</sub> nanowires were capped immediately after being mechanically exfoliated. The fabricated heterostructures were spin coated with a positive resist polymethyl methacrylate (PMMA) and heated two times. Patterning of the assembled stacks was accomplished by electron beam lithography (EBL) (LEO Supra). In order to expose TaSe<sub>3</sub> material covered by h-BN, the assembled stacks were selectively etched with sulfur hexafluoride (SF<sub>6</sub>) gas on an inductively coupled plasma system (Oxford Plasmalab). Time of ICP treatment with 50 sccm of SF<sub>6</sub> varied from 20 sec to 180 sec depending on hBN thickness and each time was adjusted gradually. Total of about fifty h-BN capped and not capped prototypes were fabricated within the scope of this work. Optical microscopy image in Figure S5 show a representative h-BN capped TaSe<sub>3</sub> nanowire device.

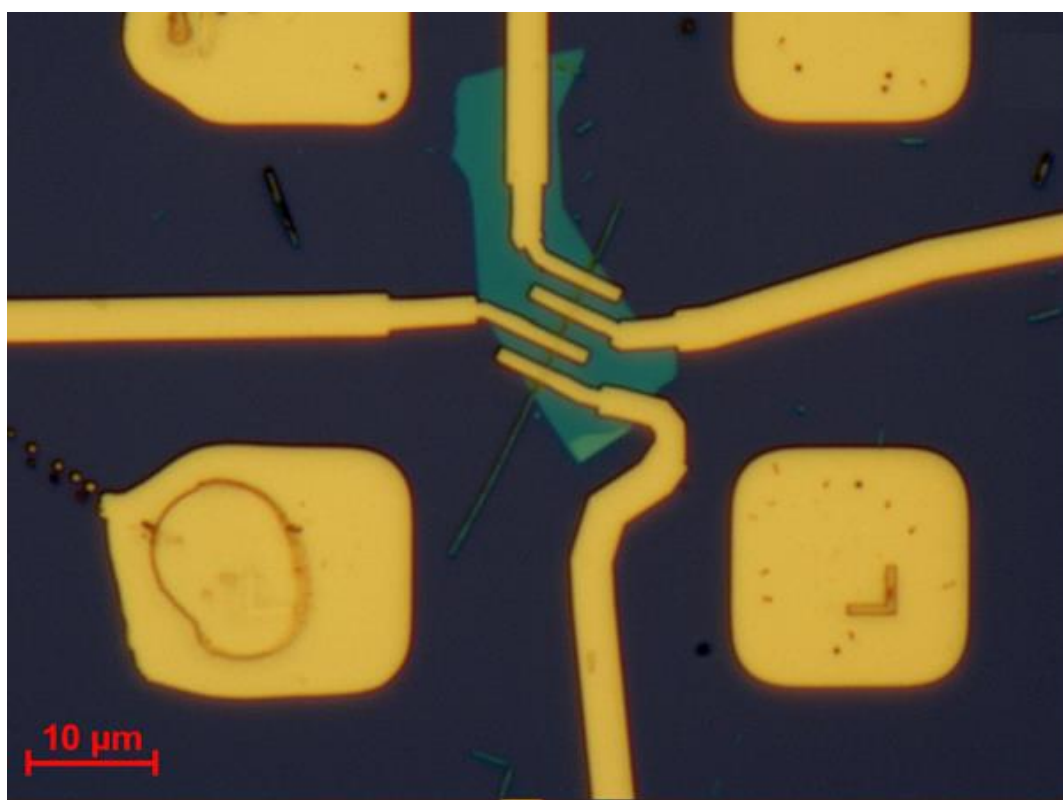

**Figure S5:** Optical microscopy images of quasi-1D TaSe<sub>3</sub> nanowire capped with h-BN layer.

## VII. Scanning Electron Microscopy

The SEM inspection confirmed significantly lower roughness of a TaSe<sub>3</sub> metallic nanowires in comparison with the deposited metal contacts (see Figure S6). Roughness estimated by AFM was in the range from 0.2 nm to 0.5 nm.

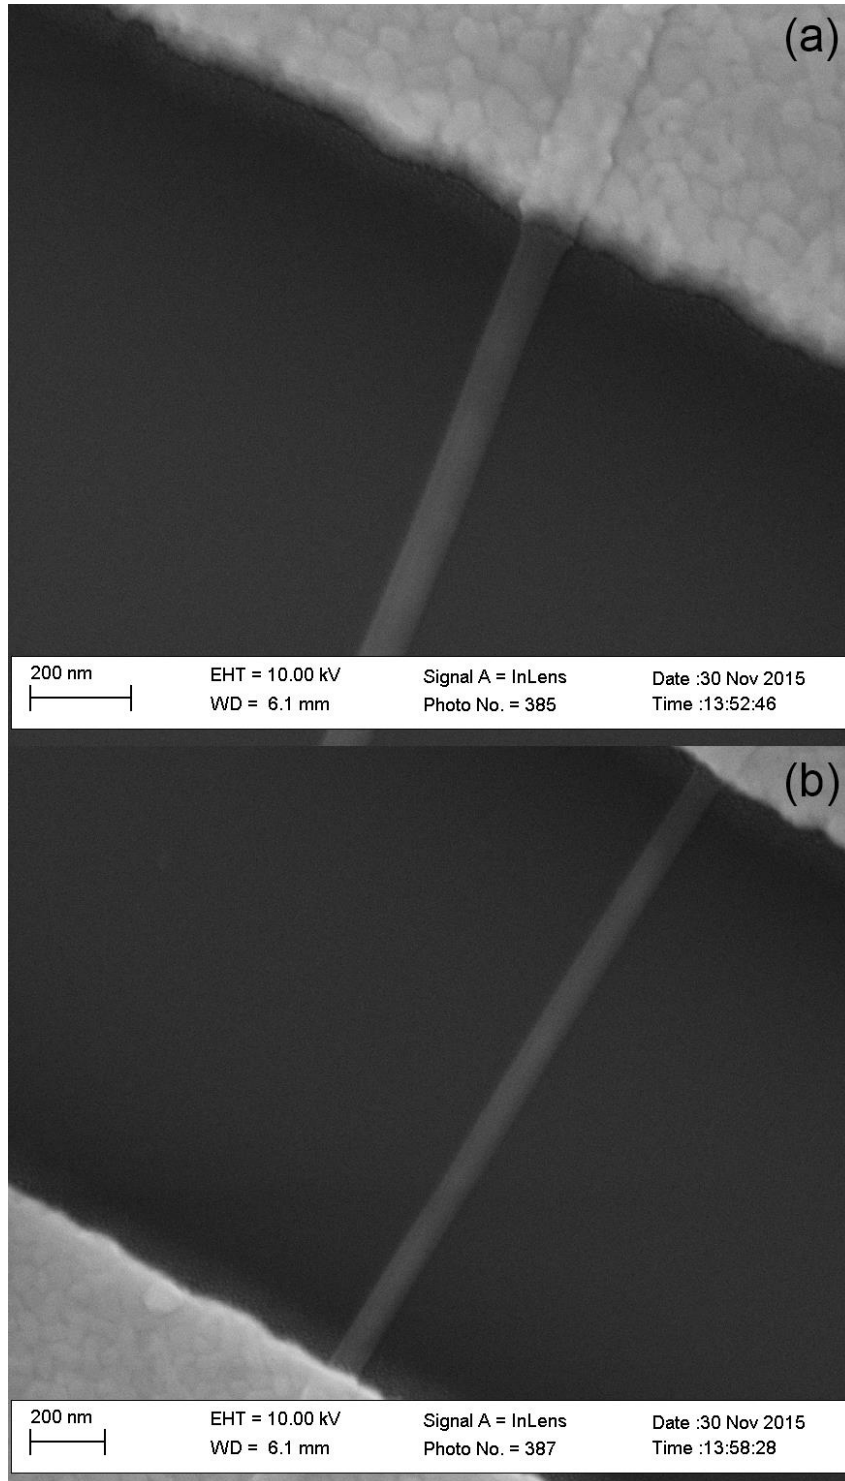

**Figure S6:** SEM images of representative quasi-1D TaSe<sub>3</sub> nanowires.
